# Supplementary material
Source: Springer Nature journal article supplement (https://www.springermedizin.de/resource/supplementary/12885_2013_3968_MOESM3_ESM.pdf/9464860)

**A**

Disease-specific survival (%)

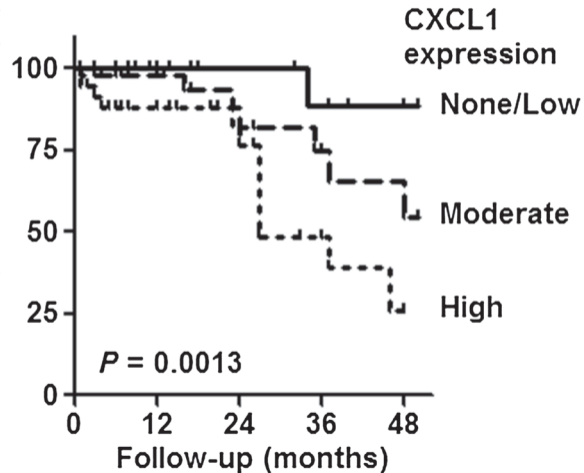**B**

Overall survival (%)

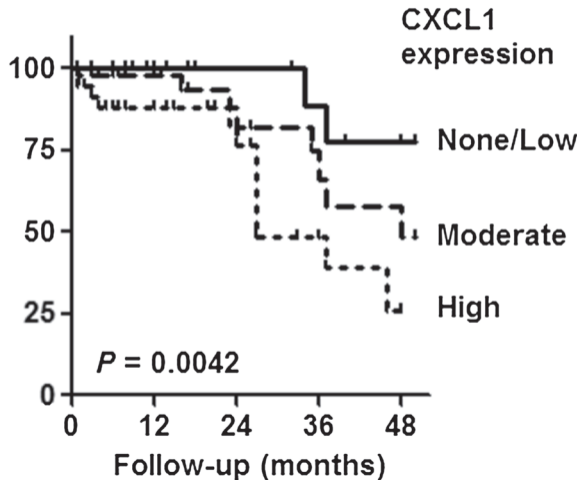

Supplement: MOESM3 [file 9464860]
